# Supplementary material
Source: Springer Nature journal article supplement (https://www.springermedizin.de/resource/supplementary/12879_2010_1507_MOESM3_ESM.pdf/9442702)

## HPV vaccination

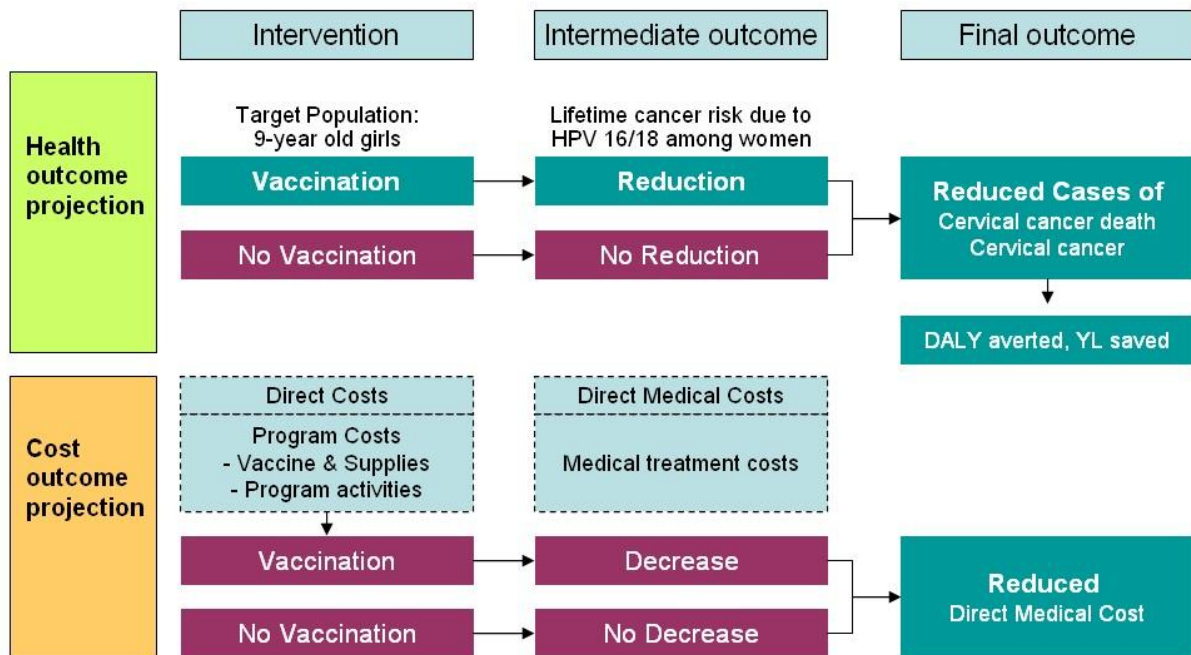

## Rotavirus vaccination

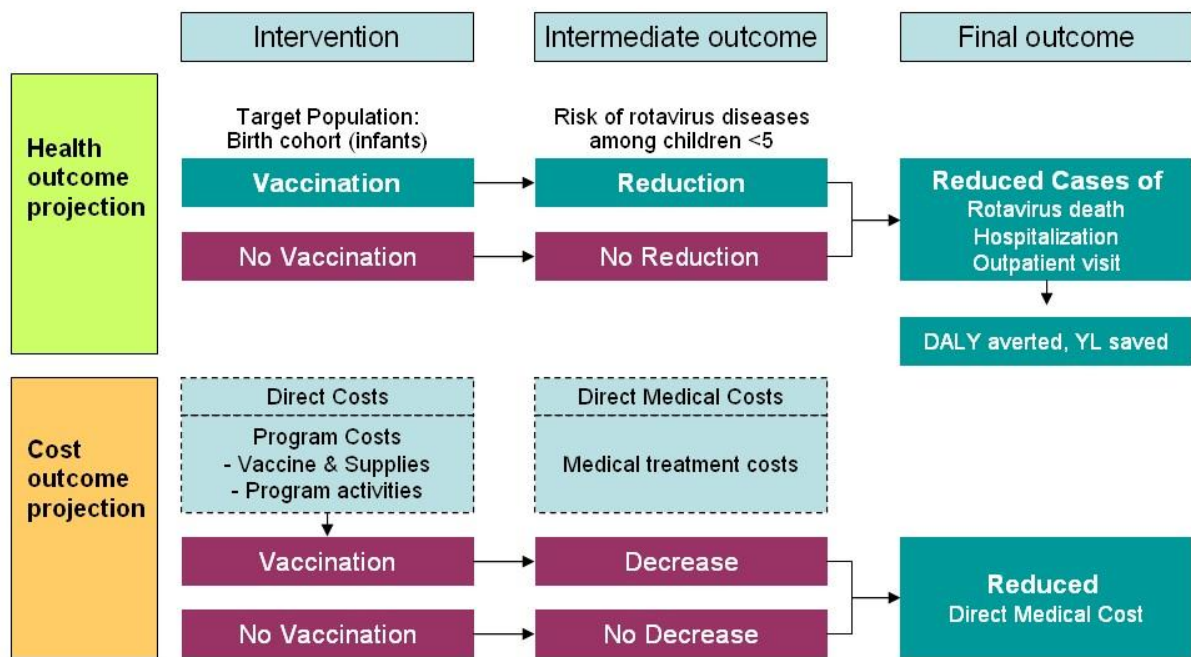

Supplement: MOESM3 [file 9442702]
